# Supplementary material for: Geochemical conditions conducive for retention of trace elements and radionuclides during shale–fluid interactions
Source: Royal Society of Chemistry journal article supplement (doi:10.1039/c9em00244h), 2019-01-01
Supplement: c9em00244h1.pdf [file c9em00244h1.pdf]

1 Supplementary Information

2 **Geochemical conditions conducive for retention of trace elements and radionuclide during**  
3 **shale-fracturing fluid interactions**

4 Neha Mehta, Benjamin D. Kocar

5 **1. The whole rock digestion procedure**

6 Approximately 10 mg of sample in a microwave vessel was pre-treated with 2 ml of 50% v/v  
7  $\text{H}_2\text{O}_2$  to decompose organics and sulfide minerals prior to digestion. Peroxide solution was added  
8 dropwise to prevent any fumes. After the initial reaction stopped (~1 hr), 9 ml concentrated  
9  $\text{HNO}_3$  (70% w/v), 4 ml HF (48% w/v) and 2 ml HCl (37% w/v) were added slowly to the vessel.  
10 The vessels were capped and heated at 180 °C in a CEM Microwave Digestor. After the  
11 digestion, 20 ml of de-ionized water (18 MΩ) water was added to the mixtures. The solutions  
12 were centrifuged at 3000 rpm for 35 min, and the supernatant was filtered in acid washed falcon  
13 tube. The solid residue was black in color, indicating that organic and other sulfide minerals  
14 were not fully decomposed. Therefore, to achieve total digestion, the residue was further  
15 digested with 10 ml of 50% w/v  $\text{H}_2\text{O}_2$  and 1 ml of conc.  $\text{HNO}_3$  and evaporated to dryness at 85  
16 °C. Second aliquot of 12 ml 50% w/v  $\text{H}_2\text{O}_2$  was added to the residue and heated at 85 °C. After 6  
17 hr of heating, solutions turned transparent and no residue was left. The solution was filtered and  
18 combined with the first supernatant. The digestion was performed on triplicates and 3 control  
19 blanks were included. Simultaneous digestion of certified reference material, SBC-1 was also  
20 performed to assess the accuracy of the digestion procedure.

21 **2. Sequential Extractions:**

22 S1: 1.0 gram composite shale sample was shaken with 16 ml of 1 M  $\text{MgCl}_2$  (pH 7) on a rotary  
23 shaker for 1 h at room temperature. Thereafter, the sample was centrifuged at 6000 rpm for 15  
24 min and the supernatant was filtered. The solid residue was rinsed with 10 ml of de-ionized

25 water (18 MΩ), which after centrifugation was collected and added to the reagent solution to be  
26 analyzed.

27 S2: The residue was shaken with 25 ml of 1M sodium acetate (pH 5) for 5 h at room  
28 temperature, centrifuged, and the supernatant filtered. The residue was rinsed with de-ionized  
29 water as in step S1 and added to reagent solution to be analyzed.

30 S3: The residue was extracted further with 40 ml of H<sub>2</sub>O<sub>2</sub> (30% w/v) at pH 2 adjusted by HNO<sub>3</sub>.  
31 The addition of peroxide took place in two stages. The first aliquot of 20 ml was slowly added to  
32 the residue and allowed to react for ~1h at room temperature. Then, the solution was gently  
33 heated at 50 °C in a water bath for 1 hr. The temperature was slowly increased to 85°C to reduce  
34 the volume to about 3 ml. After cooling, the second aliquot of 20 ml of H<sub>2</sub>O<sub>2</sub> (30% w/v) was  
35 added stepwise at 85°C until no more bubbling was observed. At this point, solid residues turned  
36 grey. After cooling, 20 ml of 0.01 N HNO<sub>3</sub> was added to desorb any metals. The supernatant was  
37 separated as described for previous fractions above.

38 S4: The shale residue after the oxidized extraction step (S4) primarily contains silicate minerals;  
39 residue composition was estimated from the difference between the whole-rock digestions and  
40 the sum of the sequential fractions (S1-S3).

42 Table S1: ICP-MS Method detection limit and element concentration in controls associated with extractions, treatments and digestion  
 43

|                                       | Cr<br>µg/L  | Mn<br>µg/L  | Fe<br>µg/L  | Co<br>µg/L  | Ni<br>µg/L  | Cu<br>µg/L  | As<br>µg/L  | Se<br>µg/L  | Sr<br>µg/L  | Cd<br>µg/L  | Ba<br>µg/L  | Pb<br>µg/L  | U<br>µg/L   |
|---------------------------------------|-------------|-------------|-------------|-------------|-------------|-------------|-------------|-------------|-------------|-------------|-------------|-------------|-------------|
| <b>ICP-MS detection Limit</b>         | <b>0.48</b> | <b>0.29</b> | <b>1.11</b> | <b>0.04</b> | <b>0.16</b> | <b>0.24</b> | <b>0.04</b> | <b>1.01</b> | <b>0.16</b> | <b>0.05</b> | <b>0.11</b> | <b>1.16</b> | <b>0.01</b> |
| Blank Concentration in each treatment |             |             |             |             |             |             |             |             |             |             |             |             |             |
| E1-ox-DI-ph7                          | BDL         | BDL         | BDL         | BDL         | BDL         | 25.6        | 0.7         | BDL         | 9.6         | BDL         | 6.6         | BDL         | BDL         |
| E1-ox-Sal-ph7                         | 3.1         | BDL         | 164.1       | 0.3         | BDL         | BDL         | 0.1         | 5.9         | 13.4        | 0.1         | 5.5         | 16.8        | BDL         |
| E2-ox-DI-ph4                          | BDL         | 11.4        | 14.5        | 0.1         | BDL         | BDL         | 0.5         | BDL         | 190.9       | BDL         | 427.2       | BDL         | BDL         |
| E2-ox-Sal-ph4                         | BDL         | BDL         | BDL         | BDL         | BDL         | 14.3        | 1.4         | 9.9         | 67.6        | BDL         | 167.7       | BDL         | BDL         |
| E3-anox-DI-ph7                        | BDL         | BDL         | BDL         | 0.7         | BDL         | 8.3         | 0.2         | BDL         | 2.0         | 0.2         | BDL         | 3.7         | 0.1         |
| E3-anox-Sal-ph7                       | BDL         | BDL         | BDL         | 0.0         | BDL         | 0.0         | BDL         |
| E4-anox-DI-ph4                        | BDL         | BDL         | BDL         | 2.4         | BDL         | 18.4        | BDL         | BDL         | 1.4         | 0.6         | BDL         | 7.2         | 0.1         |
| E4-anox-Sal-ph4                       | BDL         | BDL         | BDL         | 0.1         | 46.7        | 80.4        | 0.3         | BDL         | 11.5        | 0.2         | BDL         | 1.6         | BDL         |
| E5-anox-Sal-ph4                       | 20.6        | 2.3         | 214.9       | 1.3         | 91.4        | 6.0         | 1.6         | 4.7         | 6.0         | BDL         | BDL         | 7.8         | BDL         |
| Blank Digestion                       | 5.3         | 0.4         | 94.1        | 0.1         | 6.7         | BDL         | 3.0         | BDL         | BDL         | BDL         | BDL         | BDL         | 0.1         |
| S1-blank-Exchangeable                 | 9.3         | 52.3        | BDL         | 0.1         | 8.4         | BDL         | 2.0         | 26.0        | BDL         | 3.8         | BDL         | BDL         | BDL         |
| S2-blank-Acid-Parallel                | BDL         | BDL         | 100.0       | 0.2         | BDL         | BDL         | 0.6         | 1.3         | BDL         | 1.0         | BDL         | 2.9         | BDL         |
| S4-blank-Oxidized SQ                  | BDL         | 2.0         | 149.2       | 0.2         | BDL         | 4.9         | BDL         | BDL         | 2.6         | 0.5         | 3.9         | 1.9         | 3.9         |

44

45 Table S2: Concentration of elements extracted in batch treatments

46

|           | <b>E1-ox-DI-pH7</b>      | <b>E2-ox-DI-pH4</b>      | <b>E3-anox-DI-pH7</b>    | <b>E4-anox-DI-pH4</b>    | <b>E5-anox-DI-pH4</b>    |
|-----------|--------------------------|--------------------------|--------------------------|--------------------------|--------------------------|
|           | <b>µg g<sup>-1</sup></b> |
| <b>Cr</b> | ND                       | ND                       | 0.00 ± 0.03              | 0.44 ± 0.03              | 12.98 ± 0.86             |
| <b>Mn</b> | 0.64 ± 0.05              | 0.75 ± 0.40              | 2.07 ± 0.06              | 50.86 ± 3.41             | 113.60 ± 24.95           |
| <b>Co</b> | 4.96 ± 0.84              | 22.35 ± 5.28             | 15.69 ± 4.29             | 126.97 ± 26.11           | 317.32 ± 9.70            |
| <b>Ni</b> | 0.17 ± 0.02              | 0.85 ± 0.14              | 0.09 ± 0.05              | 4.83 ± 0.60              | 108.70 ± 3.50            |
| <b>Cu</b> | 0.04 ± 0.07              | ND                       | 0.26 ± 0.05              | 0.72 ± 0.13              | 118.88 ± 3.60            |
| <b>As</b> | 0.04 ± 0.01              | 0.07 ± 0.01              | 0.02 ± 0.0023            | 0.07 ± 0.01              | 19.48 ± 0.77             |
| <b>Se</b> | 0.26 ± 0.08              | 0.24 ± 0.17              | 0.17 ± 0.02              | 0.55 ± 0.04              | 6.28 ± 0.41              |
| <b>Sr</b> | 27.92 ± 1.02             | 41.93 ± 1.28             | 36.67 ± 0.29             | 74.29 ± 1.81             | 56.23 ± 1.40             |
| <b>Cd</b> | 0.01 ± 0.01              | 0.02 ± 0.00              | 0.01 ± 0.01              | 0.05 ± 0.01              | 0.35 ± 0.01              |
| <b>Ba</b> | 1.00 ± 0.14              | 2.09 ± 1.31              | 1.16 ± 0.05              | 2.16 ± 0.05              | 0.80 ± 0.13              |
| <b>U</b>  | 0.57 ± 0.06              | 0.86 ± 0.13              | 0.73 ± 0.03              | 0.78 ± 0.01              | 7.83 ± 0.29              |
| <b>Fe</b> | ND                       | ND                       | ND                       | 481 ± 66                 | 26542 ± 1009             |

47

|           | <b>E1-ox-Sal-pH7</b>     | <b>E2-ox-Sal-pH4</b>     | <b>E3-anox-Sal-pH7</b>   | <b>E4-anox-Sal-pH4</b>   | <b>E5-anox-Sal-pH4</b>   |
|-----------|--------------------------|--------------------------|--------------------------|--------------------------|--------------------------|
|           | <b>µg g<sup>-1</sup></b> |
| <b>Cr</b> | 0.03 ± 0.04              | 0.04 ± 0.02              | ND                       | 0.24 ± 0.02              | 9.39 ± 2.27              |
| <b>Mn</b> | 0.91 ± 0.04              | 1.99 ± 1.18              | 1.00 ± 0.02              | 48.81 ± 0.35             | 54.95 ± 7.58             |
| <b>Co</b> | 4.61 ± 0.52              | 20.43 ± 6.77             | 5.47 ± 0.66              | 114.45 ± 3.83            | 337.09 ± 16.76           |
| <b>Ni</b> | 0.26 ± 0.03              | 0.76 ± 0.08              | 0.01 ± 0.01              | 4.32 ± 0.02              | 118.89 ± 7.57            |
| <b>Cu</b> | 0.05 ± 0.08              | 0.04 ± 0.05              | 0.47 ± 0.23              | 0.61 ± 0.09              | 131.03 ± 8.07            |
| <b>As</b> | 0.03 ± 0.0033            | 0.09 ± 0.01              | 0.03 ± 0.0031            | 0.07 ± 0.0014            | 21.11 ± 2.36             |
| <b>Se</b> | 0.17 ± 0.11              | 0.56 ± 0.11              | 0.18 ± 0.01              | 0.52 ± 0.02              | 7.20 ± 0.78              |
| <b>Sr</b> | 49.90 ± 1.03             | 55.63 ± 0.42             | 49.55 ± 0.26             | 81.20 ± 1.08             | 62.01 ± 3.74             |
| <b>Cd</b> | 0.02 ± 0.03              | 0.06 ± 0.08              | 0.01 ± 0.00              | 0.07 ± 0.01              | 0.38 ± 0.02              |
| <b>Ba</b> | 5.18 ± 0.23              | 5.63 ± 0.26              | 4.86 ± 0.02              | 5.99 ± 0.06              | 1.22 ± 0.10              |
| <b>U</b>  | 0.80 ± 0.02              | 0.78 ± 0.06              | 0.63 ± 0.00              | 0.80 ± 0.01              | 8.85 ± 1.00              |
| <b>Fe</b> | ND                       | ND                       | 0.52 ± 0.73              | 372 ± 23                 | 30047 ± 2593             |

48

49

50

51

52

53

54

55

56
